# Supplementary material for: Hybrid materials of ZnO nanostructures with reduced graphene oxide and gold nanoparticles: enhanced photodegradation rates in relation to their composition and morphology
Source: Royal Society of Chemistry journal article supplement (doi:10.1039/c5cp05081b), 2015-11-23
Supplement: c5cp05081b1.pdf [file c5cp05081b1.pdf]

## Supplementary Information

### Hybrid materials of ZnO nanostructures with reduced graphene oxide and gold nanoparticles: Enhanced photodegradation rates in relation to their composition and morphology

*K. Bramhaiah,<sup>a</sup> Vidya N. Singh<sup>b</sup> and Neena S. John<sup>\*a</sup>*

<sup>a</sup>Centre for Nano and Soft Matter Sciences, Jalahalli, Bangalore-560013, India

<sup>b</sup>CSIR-National Physical Laboratory, Dr. K. S. Krishnan Road, New Delhi-110012, India

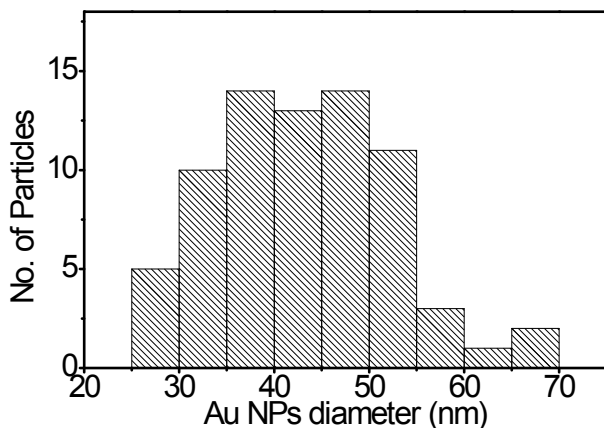

**Figure S1.** Au particle size distribution obtained from backscattered SEM images

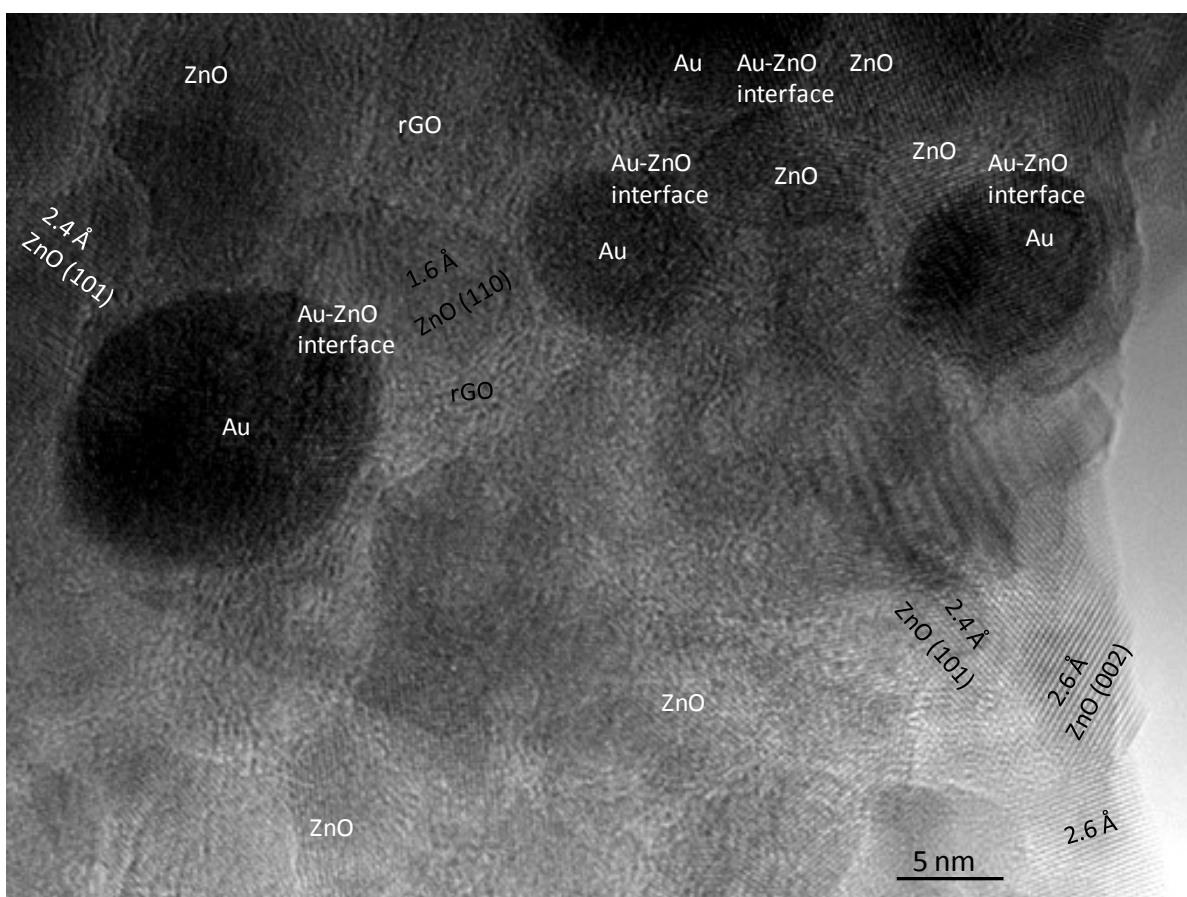

**Figure S2:** High resolution TEM of rGO-Au-ZnO NPs prepared by solution phase method showing the interfaces of lattice resolved Au NPs, ZnO NPs and rGO.

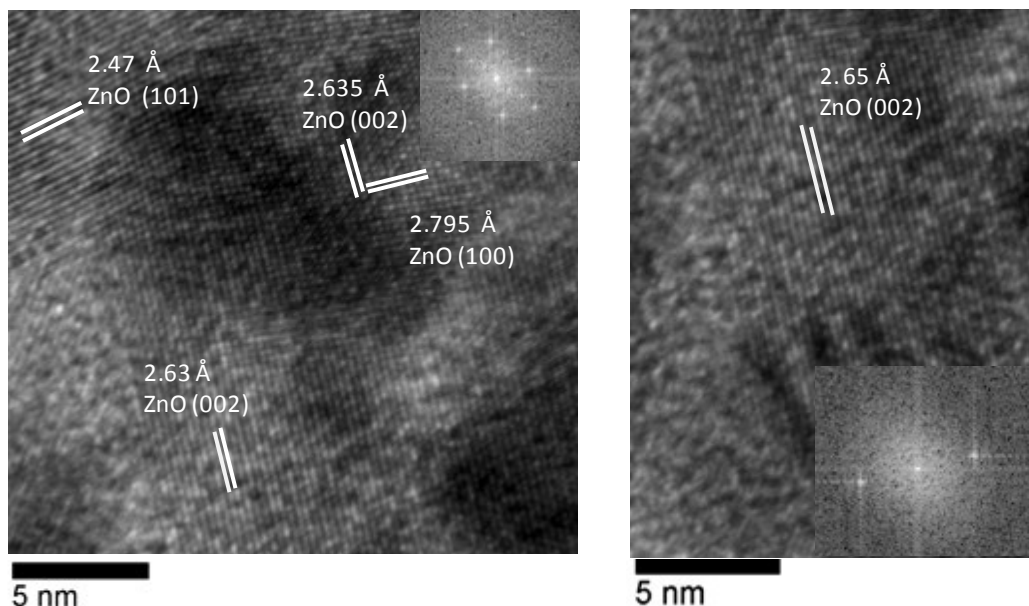

**Fig. S3.** Additional HRTEM images of rGO-ZnO NRs showing (002) planes along rod axis and other planes where rods overlap.

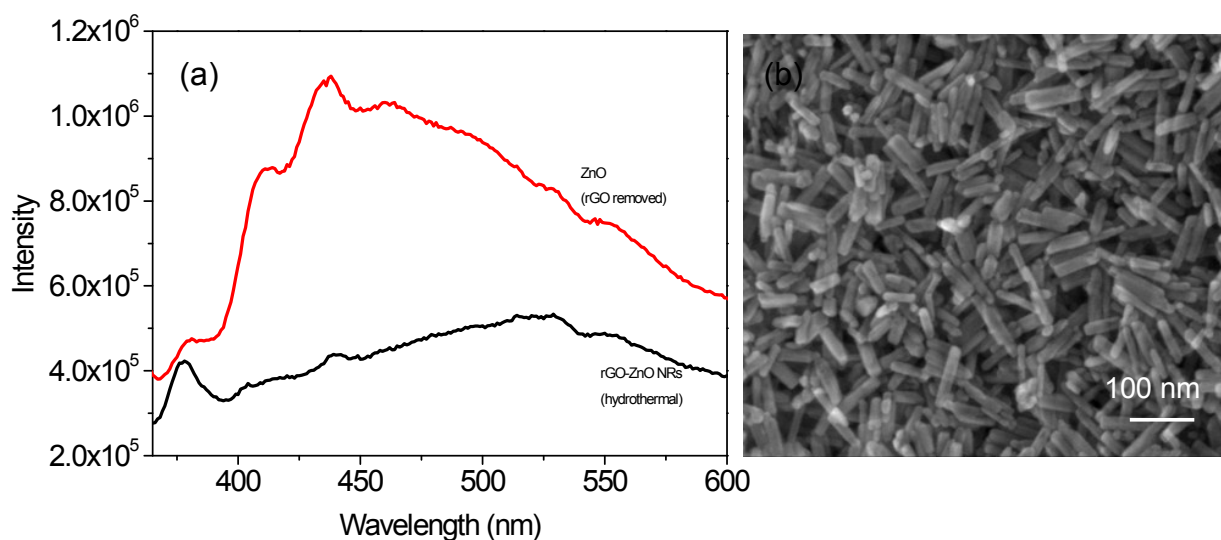

Figure S4: (a) PL spectra of rGO-ZnO NRs prepared by hydrothermal method before and after removing rGO by heating in air. (b) FESEM image of ZnO NRs after removing rGO.

Table S1: Elemental composition from EDS analysis of ZnO and its hybrids

|      | ZnO NPs solution phase |      | rGO-ZnO NPs solution |      | rGO-Au-ZnO NPs solution |     | rGO-ZnO NRs hydrothermal |      |
|------|------------------------|------|----------------------|------|-------------------------|-----|--------------------------|------|
|      | Wt%                    | At%  | Wt%                  | At%  | Wt%                     | At% | Wt%                      | At%  |
| Zn L | 70                     | 37   | 33                   | 9    | 39                      | 16  | 73                       | 38.5 |
| O K  | 30                     | 63   | 20                   | 21   | 13                      | 20  | 22                       | 47.5 |
| C K  | ----                   | ---- | 47                   | 70   | 28                      | 61  | 5                        | 14   |
| Au M | ----                   | ---- | ----                 | ---- | 20                      | 3   | ----                     | ---- |

Table S2. Rate constants for photodegradation by ZnO systems reported in the literature

| S. NO | Catalyst system                                                         | Catalyst (Wt)     | Dye ,Conc.                                                                       | UV / visible, Power                                                                                                                      | Rate                                                                                                                                                 | References                                                           |
|-------|-------------------------------------------------------------------------|-------------------|----------------------------------------------------------------------------------|------------------------------------------------------------------------------------------------------------------------------------------|------------------------------------------------------------------------------------------------------------------------------------------------------|----------------------------------------------------------------------|
| 1     | i. rGO-Au-ZnO NPs<br>ii. rGO-ZnO NPs<br>iii. rGO-ZnO NRs<br>iv. ZnO NPs | 10 mg             | 50 mL, 40 $\mu$ M Rhodamine B (RB) solution (19 ppm)                             | 200 W UV spot light source - 365 nm (intensity 110 mW/cm <sup>2</sup> ) & distance between Lamp and Vessel 4.5 cm                        | i) 97% degradation in 40 min, 0.065 min <sup>-1</sup><br>ii) 0.046 min <sup>-1</sup><br>iii) 0.033 min <sup>-1</sup><br>iv) 0.0135 min <sup>-1</sup> | <b>This Work</b>                                                     |
| 2     | Ag/ZnO/rGO composite (NPs)                                              | 11.25 mg          | 30 mL, 15 mg L <sup>-1</sup> Methylene orange (MO) & ratio dye : catalyst ,1 :25 | 365 nm (8W) & distance between Lamp and Vessel 5 cm                                                                                      | 94% degradation in 68 min                                                                                                                            | Sanjit Sarkar, CrystEngComm, 2013, 15, 7606–7614.                    |
| 3     | G/ZnO/Au                                                                | 200 mg (4 mg/mL)  | 5 mM, 50 mL Nitro Benzene                                                        | 500 W UV-visible lamp ( used filter to get <420 nm)                                                                                      | Reduction of Nitrobenzene to Aniline 97.8% in 140 min                                                                                                | Prathik Roy et al., Environ. Sci. Technol. 2013, 47, 6688–6695.      |
| 4     | rGO/ZnO NPs                                                             | 200 mg (4 mg/mL)  | 50 mL, 6 ppm RB                                                                  | Simulated sun light (UV & visible light) – Flux intensity 300 W/m <sup>2</sup>                                                           | Degradation completes in 60 min                                                                                                                      | Jinfeng Wang et al., ACS Appl. Mater. Interfaces 2012, 4, 3084–3090. |
| 5     | rGO/ZnO NPs                                                             | 60 mg (1g/L)      | 60 mL of 10 mg/L Cr (VI) solution                                                | 500 W (High pressure Hg lamp) – 365 nm                                                                                                   | 96% removal in 60 min                                                                                                                                | Xinjuan Liu et al., Chem. Eng. J. 2012, 183, 238–243.                |
| 6     | rGO-ZnO NPs (GHZ <sub>1,2</sub> )                                       | 50 mg             | 100 mL, 10 $\mu$ M solution Methylene Blue (MB)                                  | 11 W UV lamp ( $\lambda$ = 254 nm) & 175 W metal halide lamp ( $\lambda$ > 420 nm)light intensity 0.93 and 2.5 mW/cm <sup>2</sup>        | Visible light -0.60632 h <sup>-1</sup> & UV light-0.18948 min <sup>-1</sup>                                                                          | Xiaojuan Bai et al., Langmuir 2013, 29, 3097–3105.                   |
| 7     | rGO/ZnO NPs                                                             | 6 mg              | 60 mL, 0.125 mg/mL MB (7.5 mg)                                                   | UV illumination (254 nm) intensity ~ 3 mW/cm <sup>2</sup>                                                                                | 70% in 50 min                                                                                                                                        | Long Zhang et al., Physica E 2013, 47, 279–284.                      |
| 8     | rGO-ZnO NPs                                                             | 50 mg             | 50 mL, 10 $\mu$ M solution (RB &MB)                                              | 300 W (High pressure Hg lamp)-( $\lambda$ >365 nm) & visible light source 300 W (High pressure Hg lamp)-( $\lambda$ >400 nm with filter) | Complete degradation in 60 min                                                                                                                       | Baojun Li et al., J. Mater. Chem. 2011, 21, 3346–3349.               |
| 9     | ZnO/graphene                                                            | 50 mg             | 40 mL, 10 mg/L RB solution                                                       | 15 W UV light tube (365 nm) & for Visible light 150 W Xenon lamp (filters)                                                               | 100% degradation in 60 min                                                                                                                           | Qi Zhang et al., J. Mater. Chem., 2012, 22, 11778–11784.             |
| 10    | rGO/ZnO NRs                                                             | 30 mg             | 60 mL, 5 ppm conc. Cr(VI)                                                        | 300 W Xe arc lamp (visible light > 400 nm)                                                                                               | 0.17 h <sup>-1</sup>                                                                                                                                 | Xiaoyang Pan et al., Phys. Chem. Chem. Phys., 2014, 16, 5589–5599.   |
| 11    | rGO-ZnO NRs                                                             | 15 mg             | 70 mL, 100 ppm MB                                                                | 300 W Xe arc lamp ( 365 $\pm$ 15 nm)                                                                                                     | Complete degradation in 40 min                                                                                                                       | Zhang Chen et al., CrystEngComm, 2013, 15, 3022–3030.                |
| 12    | GNP/ZnO NRs                                                             | 10 mg             | 80 mL, 20 mg/L MO solution                                                       | 300 W arc lamp ( 365 $\pm$ 15 nm)                                                                                                        | 0.0622 min <sup>-1</sup>                                                                                                                             | Fangxing Xiao et al., J. Mater. Chem. 2012, 22, 2868–2877.           |
| 13    | i)ZnO NRs-rGO-CNTs<br>ii) pure ZnO                                      | 100 mL ,1.5 mg/L  | 100 mL, 5 mg/L MB solution                                                       | 500 W (High pressure Hg tube)-365 nm                                                                                                     | i)0.011 min <sup>-1</sup><br>ii) 0.00442 min <sup>-1</sup>                                                                                           | Tian Lv et al., Catal. Sci. Technol. 2012, 2, 2297–2301.             |
| 14    | rGO/ZnO nanopyramids                                                    | 25 mL, 0.25 mg/mL | 25 mL, 30 $\mu$ M Malachite green (MG) solution                                  | UV lamp (365 nm)                                                                                                                         | 78% degradation in 90 min                                                                                                                            | Natalie P. Herring et al., J. Nanopart. Res. 2012, 14, 1277.         |

|    |                                                                                                                                                                                                                                    |           |                                            |                                                |                                                                                                                                                                                                                              |                                                                        |
|----|------------------------------------------------------------------------------------------------------------------------------------------------------------------------------------------------------------------------------------|-----------|--------------------------------------------|------------------------------------------------|------------------------------------------------------------------------------------------------------------------------------------------------------------------------------------------------------------------------------|------------------------------------------------------------------------|
| 15 | rGO-ZnO Hollow sphere                                                                                                                                                                                                              | 20 mg     | 100 mL, 10 $\mu$ M solution of MB          | 500 W Hg lamp (5 cm distance)                  | Complete degradation in 90 min                                                                                                                                                                                               | Qiu-Ping Luo et al., J. Phys. Chem. C 2012, 116, 8111–8117.            |
| 16 | i) ZnO NPs<br>ii) ZnO NPs – Carbon fibers (4:1)<br>iii) ZnO NPs - Carbonfibers (8:1)                                                                                                                                               | 100 mg    | 100 mL, 10 mg/L RB                         | 50 W (High pressure Hg tube) – 313 nm          | i) 0.02187 $\text{min}^{-1}$<br>ii) 0.05350 $\text{min}^{-1}$<br>iii) 0.07533 $\text{min}^{-1}$                                                                                                                              | Jingbo Mu et al., ACS Appl. Mater. Interfaces 2011, 3, 590–596.        |
| 17 | Au/ZnO Nano composite                                                                                                                                                                                                              | 100 mg    | 50 mL, 20 $\mu$ M RB solution              | Direct SUN light (~50000 lx)                   | 0.0291 $\text{min}^{-1}$                                                                                                                                                                                                     | Chanchal Modal et al., New J. Chem. 2014, 38, 2999–3005.               |
| 18 | Au/ZnO NRs                                                                                                                                                                                                                         | 30 mg     | 40 mL, 20 $\mu$ M RB solution              | 300 W (High pressure Hg lamp) – 365 nm         | 100% degradation in 15 min                                                                                                                                                                                                   | Qian Wang et al., Environ. Sci. Technol. 2009, 43, 8968–8973.          |
| 19 | Au-ZnO Nano pyramids                                                                                                                                                                                                               | 30 mg     | 1 mL, 1 mmol/L RB                          | 300 W Xenon lamp                               | 100% degradation in 10 min                                                                                                                                                                                                   | Peng Li et al., J. Am. Chem. Soc. 2011, 133, 5660–5663.                |
| 20 | Ag-ZnO NRs (5 wt % of Ag on ZnO)                                                                                                                                                                                                   | 30 mg     | 90 mL, 50 $\mu$ M MO solution              | 4*4 W fluorescent Hg lamps (365 nm)            | 100% degradation in 30 min                                                                                                                                                                                                   | Yuanhui Zheng et al., Inorg. Chem. 2007, 46, 6980-6986.                |
| 21 | Au NPs-ZnO Nanosheet                                                                                                                                                                                                               | Not given | 15 ppm of MO                               | 365 nm_Intensity 150 mW/Cm <sup>2</sup>        | 75% degradation in 240 min                                                                                                                                                                                                   | Yu-Hsiang Sung et al., Phys. Chem. Chem. Phys., 2012, 14, 14492–14494. |
| 22 | i) ZnO Nano fibers<br>ii) Ag – ZnO Nano fibers (7.5% of Ag)                                                                                                                                                                        | 10 mg     | 10 mL, 25 $\mu$ M RB solution              | 8 W (low pressure Hg tube) – 254 nm            | i) 0.0025 $\text{min}^{-1}$<br>ii) 0.024 $\text{min}^{-1}$                                                                                                                                                                   | Dandan Lin et al., Chem. Mater. 2009, 21, 3479–3484.                   |
| 23 | ZnO NPs (25 nm)                                                                                                                                                                                                                    | 10 mg     | 100 mL (1.5mg) of 15 mg L <sup>-1</sup> MB | UV A tubes – 365 nm (0.3 mW Cm <sup>-2</sup> ) | 0.0275 $\text{min}^{-1}$                                                                                                                                                                                                     | Anna Mclaren et al., J. Am. Chem. Soc. 2009, 131, 12540–12541.         |
| 24 | i). ZnO (THF) Cauliflower<br>ii). ZnO (Decane) Truncated hexagonal conical<br>iii). ZnO (Acetone) Nano spherical<br>iv). ZnO (Ethanol) NRs<br>v). ZnO (water) Tubular<br>vi). ZnO (Toluene) Hour glass like<br>vii) Commercial ZnO | 50 mg     | 50 mL, 15 ppm Phenol solution              | Six 15 W UV lamps (254 nm)                     | i) 0.1469 $\text{min}^{-1}$<br>ii) 0.0867 $\text{min}^{-1}$<br>iii) 0.0385 $\text{min}^{-1}$<br>iv) 0.0468 $\text{min}^{-1}$<br>v) 0.0651 $\text{min}^{-1}$<br>vi) 0.0518 $\text{min}^{-1}$<br>vii) 0.0182 $\text{min}^{-1}$ | Liping Xu et al., Chem. Mater. 2009, 21, 2875–2885.                    |
| 25 | ZnO NRs & ZnO nano crystals                                                                                                                                                                                                        | 20 mg     | 50 mL, 50 $\mu$ M MO solution              | 300 W (High pressure Hg lamp) – 365 nm         | Complete degradation in 60 min                                                                                                                                                                                               | Yuanhui Zheng et al., Inorg. Chem. 2007, 46, 6675-6682.                |
| 26 | i). ZnO NPs<br>ii) ZnO NRs<br>iii) ZnO NWRs<br>iv) ZnO undeveloped NRs                                                                                                                                                             | 20 mg     | 100 mL, 10 $\mu$ M RB solution             | 125 W UV lamp                                  | i) 0.07205 $\text{min}^{-1}$<br>ii) 0.0491 $\text{min}^{-1}$<br>ii) 0.0614 $\text{min}^{-1}$<br>iv) 0.0466 $\text{min}^{-1}$                                                                                                 | Li Wang et al., Inorg. Chem. 2008, 47, 1443-1452.                      |
